# Supplementary material for: Biodegradation, Decolorization, and Detoxification of Di-Azo Dye Direct Red 81 by Halotolerant, Alkali-Thermo-Tolerant Bacterial Mixed Cultures
Source: MDPI journal article supplement (doi:10.3390/microorganisms10050994), 2022-05-09
Supplement: s1 [file s1]

# Supplementary Materials

## Supplementary Figures

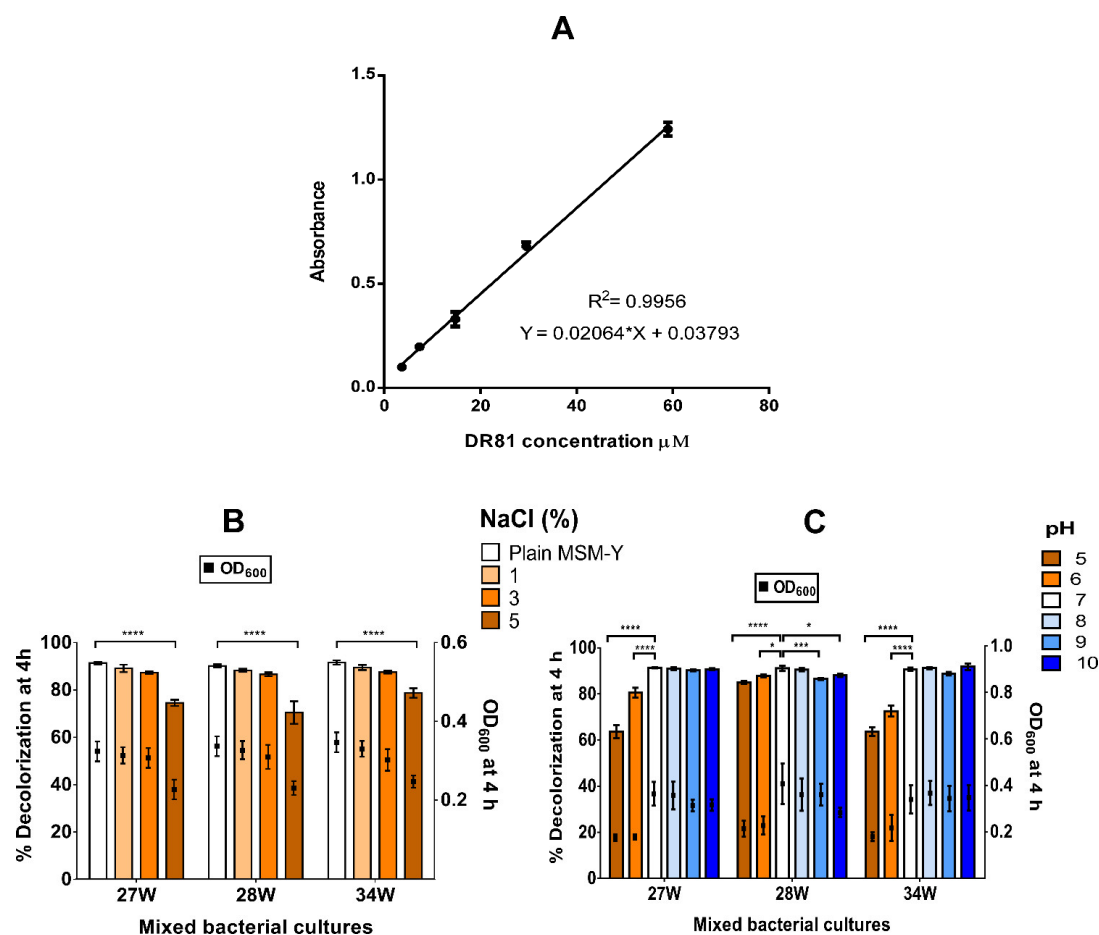

**Figure S1: A panel showing DR81 calibration curve and the effect of both salinity and pH on DR81 decolorization. (A)** Calibration curve for DR81 azo dye. Absorbances were recorded for three separate replicates and results were expressed as mean absorbance  $\pm$  SD, **(B)** Effect of NaCl concentration on DR81 decolorization after 4 h by the selected mixed cultures, **(C)** Effect of pH on DR81 decolorization after 4 h by the selected mixed cultures. Data represent three replicates and analyzed by GraphPad prism using two-way ANOVA with Tukey's multiple comparison test and results were expressed as mean % decolorization  $\pm$  SD. Significance of % decolorization was defined as \*  $p \leq 0.05$ , \*\*  $p \leq 0.01$ , \*\*\*  $p \leq 0.001$ , \*\*\*\*  $p \leq 0.0001$ .

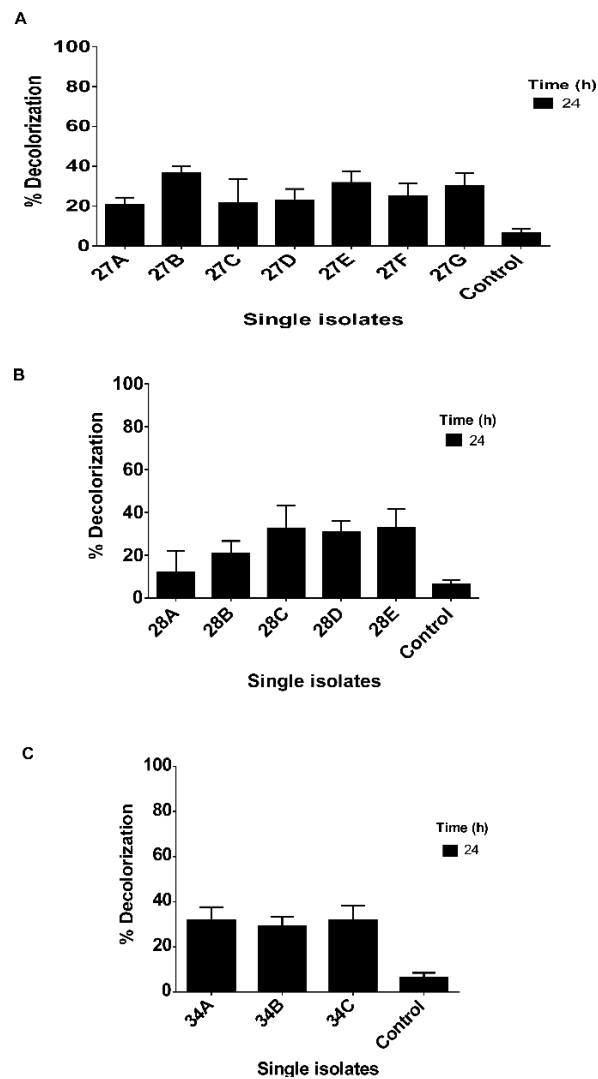

**Figure S2. Decolorization of DR81 by single colonies isolated from the selected mixed bacterial cultures (A) 27W, (B) 28W and (C) 34W after 24 h.** Single isolates showed no decolorization at time intervals 2, 4, 6 and 8 h and no visible complete decolorization was detected at 24 h when compared to their corresponding mixed culture. Data represent at least three replicates and plotted as mean % decolorization  $\pm$  SD using GraphPad prism.

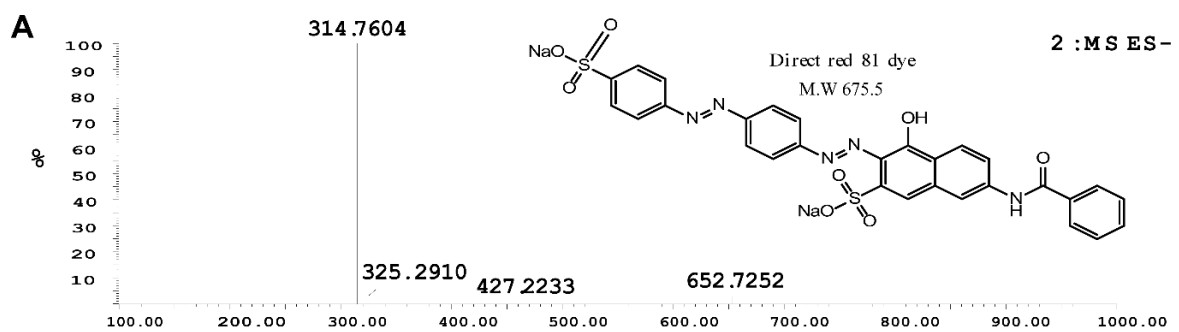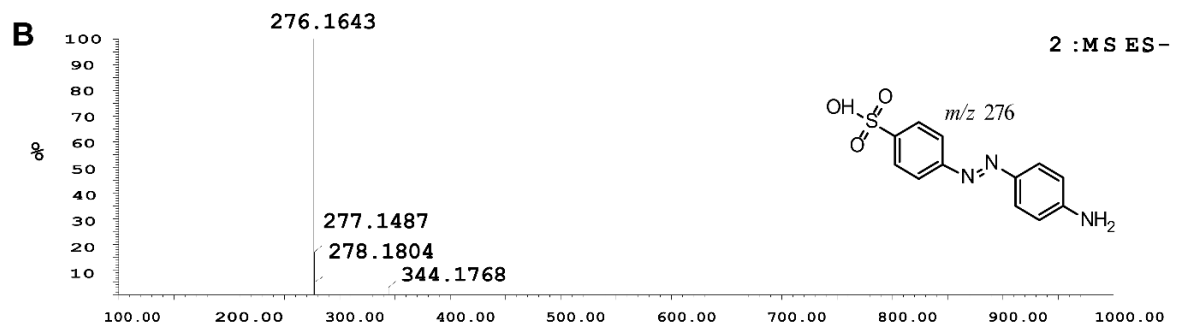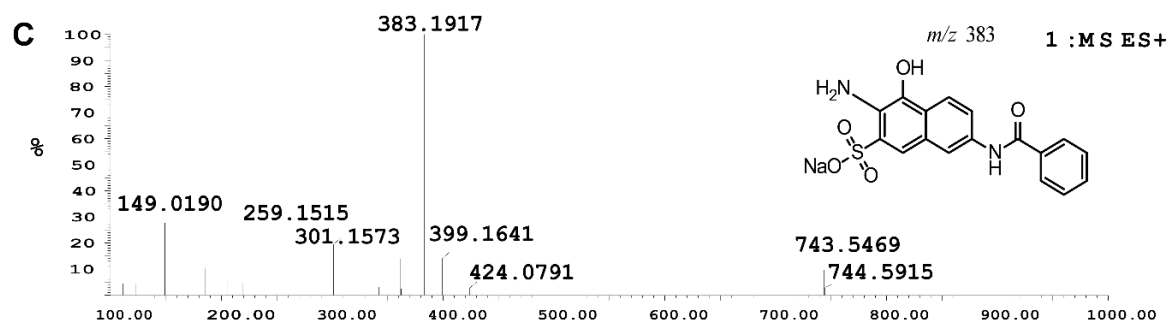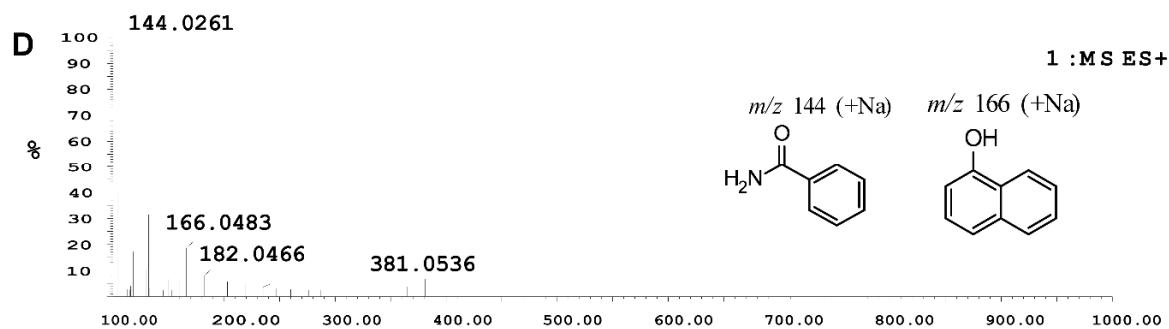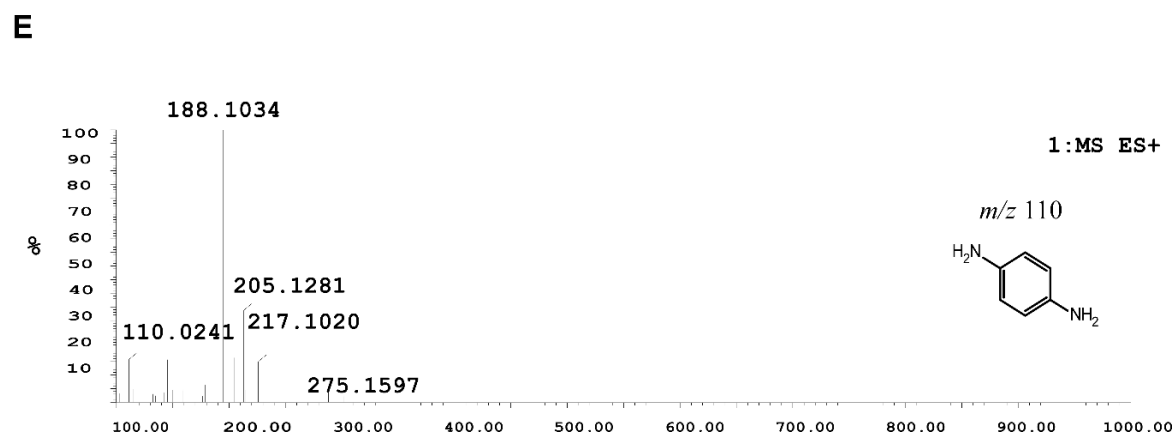

**Figure S3.** Mass spectra, chemical structures, and IUPAC names for the parent dye DR81 and the possible detected metabolites in the resolubilized methanolic extract of culture supernatant from symmetric cleavage by azoreductase extracted after 1 and 2 h incubation, analyzed using HPLC-MS. (A) DR81 parent dye with  $m/z$  314.7 and 652.7 in the ESI-mode (sodium 7-benzamido-4-hydroxy-3-((E)-4-((E)-(4-sulfonatophenyl)diazenyl)phenyl)diazenyl)naphthalene-2-sulfonate). (B) Metabolite with  $m/z$  276 in the ESI- mode (E)-4-((4-aminophenyl)diazenyl)benzenesulfonic acid. (C) Metabolite with  $m/z$  383 in the ESI+ mode (sodium 3-amino-7-benzamido-4-hydroxynaphthalene-2-sulfonate). (D) Metabolites in the ESI+ mode with  $m/z$  166 (naphthalen-1-ol) and metabolite with  $m/z$  144 (benzamide). (E) Metabolite with  $m/z$  110 in the ESI+ mode (benzene-1,4-diamine).

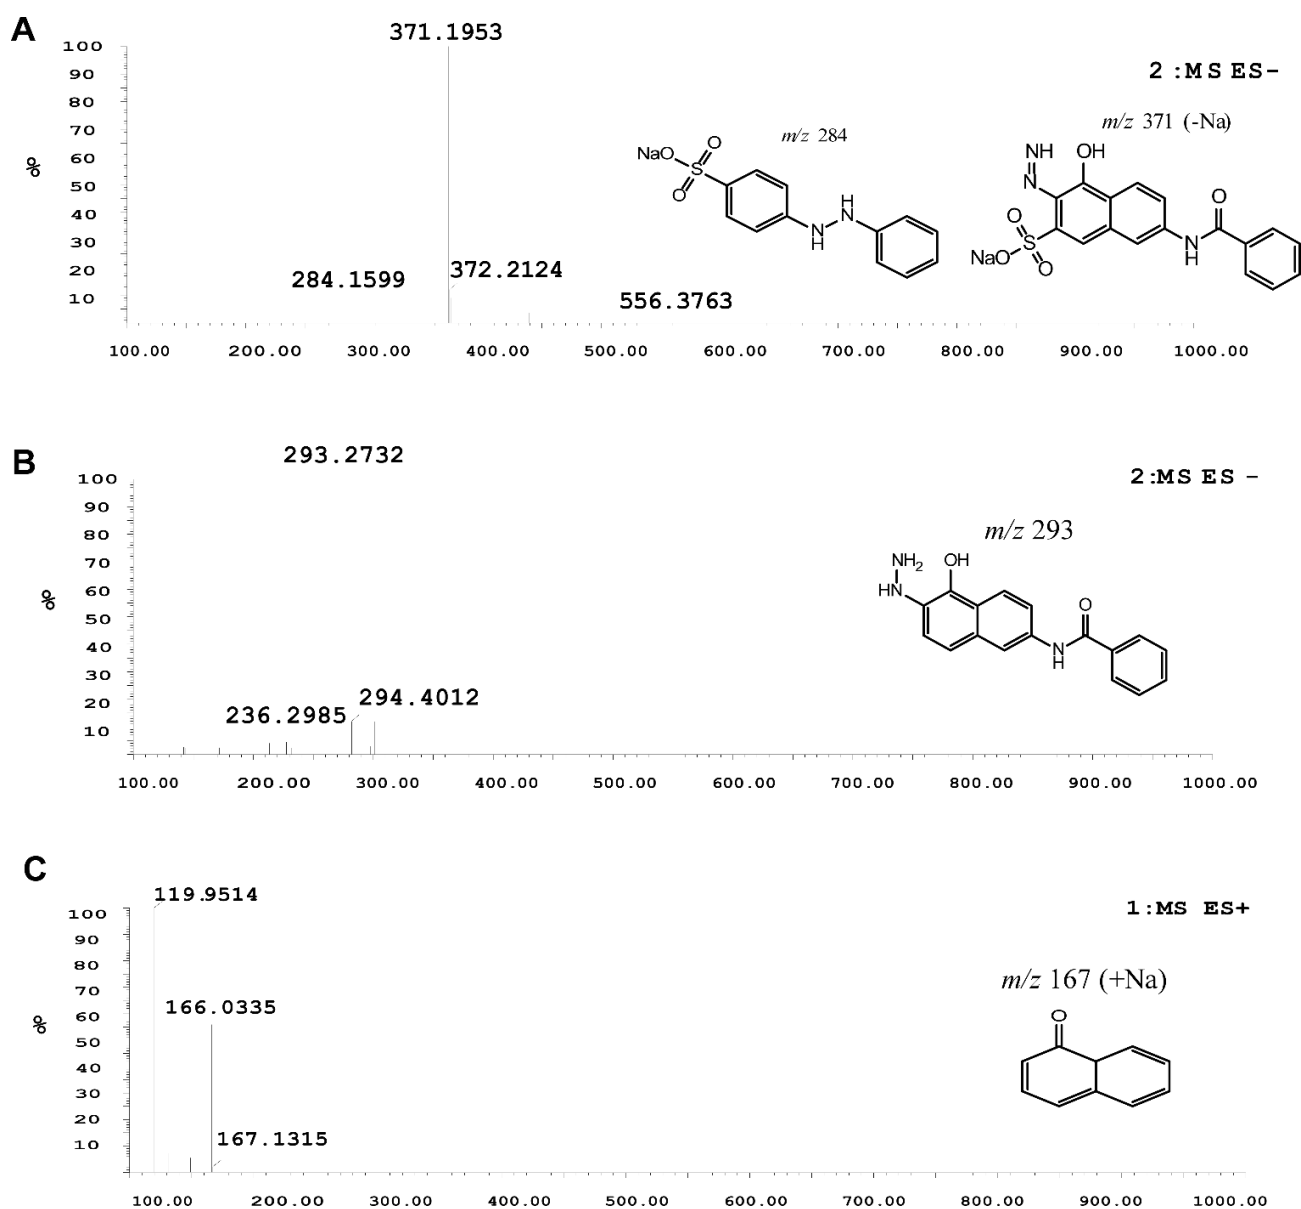

**Figure S4.** Mass spectra, chemical structures, and IUPAC names for the possible detected metabolites in the resolubilized methanolic extract of culture supernatant from asymmetric reductive cleavage extracted after 1 and 2 h incubation, analyzed using HPLC-MS. (A) Metabolites in the ESI- mode with  $m/z$  371 (sodium 7-benzamido-3-diazenyl-4-hydroxynaphthalene-2-sulfonate) and  $m/z$  284 (sodium 4-(2-phenylhydrazinyl)benzenesulfonate). (B) Metabolite with  $m/z$  293 in the ESI- mode N-(6-hydrazinyl-5-hydroxynaphthalen-2-yl)benzamide. (C) Metabolite with  $m/z$  167 in the ESI+ mode (naphthalen-1(8aH)-one).

## Supplementary Tables

**Table S1.** Physicochemical parameters of non-sterile wastewater (NSWW) effluent from tanning industrial zone before treatment and after 8 h treatment with selected mixed cultures.

| Parameters             | Untreated wastewater at 0 time | Treated wastewater after 8 h by selected mixed cultures |        |        |
|------------------------|--------------------------------|---------------------------------------------------------|--------|--------|
|                        |                                | 27W                                                     | 28W    | 34W    |
| pH                     | 8.94                           | 8.76                                                    | 8.68   | 8.6    |
| TDS <sup>1</sup>       | 1450                           | 1150                                                    | 1050   | 1035   |
| TSS <sup>2</sup>       | 88                             | 56                                                      | 50     | 43     |
| COD <sup>3</sup>       | 2842                           | 694                                                     | 595    | 505    |
| BOD <sup>4</sup>       | 500                            | 50                                                      | 45     | 41     |
| Phosphate <sup>5</sup> | 60                             | 16.3                                                    | 15.9   | 13.8   |
| Ammonium               | 10                             | < 0.01                                                  | < 0.01 | < 0.01 |
| Nitrate                | 0.6                            | 0.3                                                     | 0.25   | 0.25   |
| Total nitrogen         | 0.13                           | 0.07                                                    | 0.05   | 0.05   |
| Phenols                | 3.2                            | 1.88                                                    | 1.5    | 1.38   |
| Carbonate              | nil                            | nil                                                     | nil    | nil    |
| Bicarbonate            | 976                            | 10.67                                                   | 15     | 10     |
| Total hardness         | 740                            | 680                                                     | 590    | 501    |

<sup>1</sup> TDS: total dissolved solids, <sup>2</sup>TSS total suspended solids, <sup>3</sup>COD chemical oxygen demand, <sup>4</sup>BOD biological oxygen demand. <sup>5</sup>All parameters were expressed in mg/l, except pH.

**Table S2:** Primers used for PCR and sequencing of azoreductase genes in the selected mixed cultures

| Name                         | Primer Sequence (5-3')     | Microorganism                            | Product size (bp) | Annealing temp (°C) |
|------------------------------|----------------------------|------------------------------------------|-------------------|---------------------|
| <i>Alc_F_1</i>               | ATGAAACTGCTACACGTAGA       | <i>Alcaligenes faecalis</i>              | 617               | 49.1                |
| <i>Alc_R_601</i>             | CTCTTTTCCAGCAAGGC          |                                          |                   |                     |
| <i>Pch_F_29</i>              | ACACGGGCAAGGGTCTG          | <i>Pseudochrobactrum saccharolyticum</i> | 524               | 47.7                |
| <i>Pch_R_533</i>             | GTTCTCGTTTTTGCCGGATC       |                                          |                   |                     |
| <i>Ach_F_1_8</i>             | ATGAAGACCCTCGTCATCC        | <i>Achromobacter xylosoxidans</i>        | 626               | 51.2                |
| <i>Ach_R_612_8</i>           | GCCTGCCGCGAGACT            |                                          |                   |                     |
| <i>Sten_F_1</i> <sup>a</sup> | ATGAAGCTTCTGCAYMTCGA       | <i>Stenotrophomonas maltophilia</i>      | 574               | 50.2                |
| <i>Sten_R_558</i>            | CTTCGACCACTTCGTGC          |                                          |                   |                     |
| <i>Ps_F_61</i> <sup>a</sup>  | RCTCATGTTCAGGCC            | <i>Pseudomonas monteilii</i>             | 505               | 49.1                |
| <i>Ps_R_549</i>              | CCAGCAGGATTCCGTTT          |                                          |                   |                     |
| <i>Ps_F_18</i>               | CGATTGAGCATCCTGG           | <i>Pseudomonas putida</i>                | 583               | 49.1                |
| <i>Ps_R_583</i>              | AAACAGCTCGTTGGCAAT         |                                          |                   |                     |
| <i>Ps_F_1</i> <sup>a</sup>   | ATGAAACTGYTGYACATCGA       | <i>Pseudomonas taiwanensis</i>           | 593               | 51.2                |
| <i>Ps_R_574</i> <sup>a</sup> | KCGYTGGCAATCTGCGCCTG       |                                          |                   |                     |
| <i>Pr_F_1</i>                | ATGAAAAAGATCCTTGTACT       | <i>Proteus vulgaris</i>                  | 592               | 42                  |
| <i>Pr_R_573</i> <sup>a</sup> | CAGYATCAATTTCTTTTGT        |                                          |                   |                     |
| <i>Paen_F_22</i>             | ACTGCCCATCCTCATGATCA       | <i>Paenibacillus taichungensis</i>       | 518               | 44.6                |
| <i>Paen_R_520</i>            | ACAAAAATGCCTTCAAGCTT       |                                          |                   |                     |
| <i>U4</i>                    | AGG CCC GGG AAC GTA TTC AC | 16S rRNA gene                            | 481               | 52                  |
| <i>U5T</i>                   | TCA AAT GAA TTG ACG GGG GC |                                          |                   |                     |

<sup>a</sup> Degenerate primer

**Table S3.** Decolorization of DR81 azo dye by selected bacterial mixed cultures showing both decolorized suspensions and cell pellets.

| Azo dye       | Mixed cultures | Before decolorization                                                               | After decolorization                                                                 |                                                                                       |
|---------------|----------------|-------------------------------------------------------------------------------------|--------------------------------------------------------------------------------------|---------------------------------------------------------------------------------------|
|               |                |                                                                                     | Suspension                                                                           | Supernatant and cell pellets                                                          |
| Direct red 81 | 27W            | 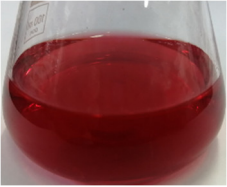   |    |    |
|               | 28W            |    |    |    |
|               | 34W            |  |  |  |
